# Supplementary material for: Workplace Interventions to Improve Physical Activity, Reduce Sedentary Behavior, and Promote Healthy Diet Among Employees in Low- and Middle- Income Countries: A Systematic Review
Source: Research Square preprint supplement (doi:10.21203/rs.3.rs-9730653/v1), 2026-07-14
Supplement: Supplementary file 1 [file f09f38780d8eba7702896e0d.docx]

## **Supplementary file**

S1: Search strategies used for each database and results

| Pubmed | ((Employees[Mesh] OR employee* OR worker* OR staff OR office worker* OR sedentary worker* OR “desk job*” OR sedentary) AND (Intervention Studies OR intervention* OR “physical activity” OR "sedentary behavior"[Mesh] OR "diet"[Mesh] OR nutrition* OR "exercise"[Mesh] OR fitness OR lifestyle OR "CVD risk factor*" OR “cardiovascular diseases risk factor*”) AND ("Workplace"[Mesh] OR "occupational health"[Mesh] OR "occupational setting*" OR "worksite" OR "office-based") AND ("Developing countries"[MeSH Terms] OR "Low-income countries" OR "Middle-income countries” OR "LMICs" OR "Low and middle-income countries" OR "Resource-limited settings" OR "Africa" OR "Asia" OR "Latin America" OR "South America")) | PubMed=270  Filters applied: English, Humans, from 2000/1/1 - 2025/5/16 |
| --- | --- | --- |
| Google scholar | (employee* OR worker* OR staff OR "office worker*" OR "sedentary worker*" OR "desk job*" OR sedentary)  AND  (intervention* OR "physical activity" OR "sedentary behavior" OR diet OR nutrition* OR exercise OR fitness OR lifestyle OR "CVD risk factor*" OR "cardiovascular risk factor*")  AND  (workplace OR "occupational health" OR "occupational setting*" OR worksite OR "office-based")  AND  ("developing countr*" OR "low-income countr*" OR "middle-income countr*" OR LMICs OR "low and middle-income countr*" OR "resource-limited setting*" OR Africa OR Asia OR "Latin America" OR "South America") | About 17,800  2000-2025, top 500 studies extracted |
| Open Access Theses and Dissertations (OATD) | (employee* OR worker* OR staff OR "office worker*" OR "sedentary worker*" OR "desk job*" OR sedentary) AND (intervention* OR "physical activity" OR "sedentary behavior" OR diet OR nutrition* OR exercise OR fitness OR lifestyle OR "CVD risk factor*" OR "cardiovascular risk factor*") AND (workplace OR "occupational health" OR "occupational setting*" OR worksite OR "office-based") AND ("developing country*" OR "low-income country*" OR "middle-income country*" OR LMICs OR "low and middle-income country*" OR "resource-limited setting*" OR Africa OR Asia OR "Latin America" OR "South America") | 155 |
| Cochrane | ((employee* OR "office worker" OR "sedentary worker" OR "desk job")):ti,ab,kw AND (("physical activity" OR exercise OR "sedentary behavior" OR diet OR "CVD risk factor")):ti,ab,kw AND ((workplace OR "occupational health" OR "office-based")):ti,ab,kw AND (("low-income countries" OR "middle-income countries" OR LMIC OR "resource-limited settings")):ti,ab,kw OR ((Africa OR Asia OR "Latin America")):ti,ab,kw" with Publication Year from 2000 to 2025, in Trials (Word variations have been searched) | 65 |
| Scopus | (( TITLE-ABS-KEY ( workplace ) ) OR ( TITLE-ABS-KEY ( employee* ) ) OR ( TITLE-ABS-KEY ( offices ) ) OR ( TITLE-ABS-KEY ( "desk job" ) ) OR ( TITLE-ABS-KEY ( occupation* ) )) AND (( TITLE-ABS-KEY ( "sedentary behaviour" ) ) OR ( TITLE-ABS-KEY ( lifestyle AND intervention ) ) OR ( TITLE-ABS-KEY ( "physical activity" ) ) OR ( TITLE-ABS-KEY ( exercise ) ) OR ( TITLE-ABS-KEY ( diet ) ) OR ( TITLE-ABS-KEY ( nutrition ) ) OR ( TITLE-ABS-KEY ( fitness ) )) AND (( TITLE-ABS-KEY ( lmics ) ) OR ( TITLE-ABS-KEY ( "low and middle income countries" ) ) OR ( TITLE-ABS-KEY ( "developing countries" ) )) AND (( TITLE-ABS-KEY ( "cardiovascular risk factor*" ) ) OR ( TITLE-ABS-KEY ( "CVD risk factor*" ) ) OR ( TITLE-ABS-KEY ( "Blood pressure" ) ) OR ( TITLE-ABS-KEY ( cholesterol ) ) OR ( TITLE-ABS-KEY ( obesity ) ) OR ( TITLE-ABS-KEY ( "abdominal obesity" ) ) OR ( TITLE-ABS-KEY ( "diabetes millitus" ) ) OR ( TITLE-ABS-KEY ( "diabetes mellitus" ) )) AND PUBYEAR > 1999 AND PUBYEAR < 2026 | 222 |
| Database searches were conducted between June and August 2025 | | |
